# Supplementary material for: Natural Hosts and Genetic Diversity of the Emerging Tomato Leaf Curl New Delhi Virus in Spain
Source: Front Microbiol. 2019 Feb 20;10:140. doi: 10.3389/fmicb.2019.00140 (PMC6391364; doi:10.3389/fmicb.2019.00140)
Supplement: TABLE S3 — Statistic results for each PCA dimension from ToLCNDV-A genome, displaying the correlation coefficient and p-value for each variable analyzed. [file Table_3.xlsx]

## Sheet: Table 2S
	ToLCNDV DNA-A
	PCA dimension 1 (32.08%)			PCA dimension 2 (19.92%)
	Variables			Variables
	Name	Correlation coef	p-value	Name	Correlation coef	p-value
	SNPs	0.8664319	3.00459e-14	Mutation frequency	0.9206	9.2866e-19
	Shannon Index	0.8195031	1.03359e-11	Mutation frequency CP	0.8045	4.7032e-11
	Transitions	0.8155604	1.56169e-11	Mutation frequency AC2	0.6479	1.9842e-06
	Nucleotide Diversity	0.8106187	2.58433e-11	Mutation frequency Ren	0.6059	1.3081e-05
	Transversions	0.7823154	3.57561e-10	Mutation frequency AV2	0.5053	0.000467248
	Haplotype number	0.7132747	5.5277e-08	Haplotype number	0.3324	0.027444
	Same strand recombinations	0.6026738	1.49824e-05	Same strand recombinations	-0.3605444	0.016207
	Double strand recombinations	0.5522078	0.000101848	Indels	-0.4873364	0.00079342
	mutation frequency Rep	0.4796218	0.000986749	Factors
	mutation frequency AC4	0.3975486	0.00753439	Name	R2	p-value
	mutation frequency TrAp	0.3800626	0.0109352	Year	0.6881227	1.957e-09
				Categories
				Name	Estimate	p-value
				2016	2.4361	4.9321e-12
				Datura	2	0.045908
				2012	-0.8163212	0.023298
				2015	-0.8277204	0.0012056
